# Supplementary material
Source: PubMed Central journal article supplement (PMC7407535)
Supplement: ao0c01405_si_001.pdf [file ao0c01405_si_001.pdf]

## **Supporting Information**

### **Improvement of the gas barrier properties of the PLA/OMMT films by regulating the interlayer spacing of OMMT and the crystallinity of PLA**

Fenfen Li<sup>1</sup>, Caili Zhang<sup>1,2\*</sup>, Yunxuan Weng<sup>1,2\*</sup>

<sup>1</sup> School of Materials and Mechanical Engineering, Beijing Technology and Business University, Beijing 100048, China.

<sup>2</sup> Beijing Key Laboratory of Quality Evaluation Technology for Hygiene and Safety of Plastics, Beijing Technology and Business University, Beijing 100048, China.

\*Corresponding authors: zhangcaili@btbu.edu.cn; yunxuan@th.btbu.edu.cn.

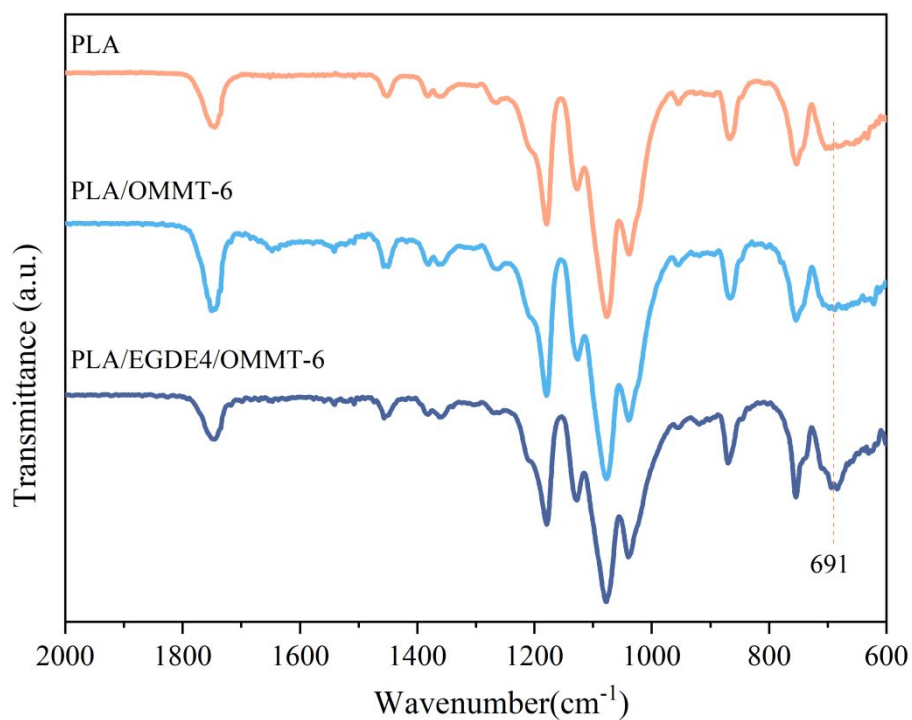

**Figure S1** ATR spectra of neat PLA, PLA/OMMT-6 and PLA/EGDE4/OMMT-6

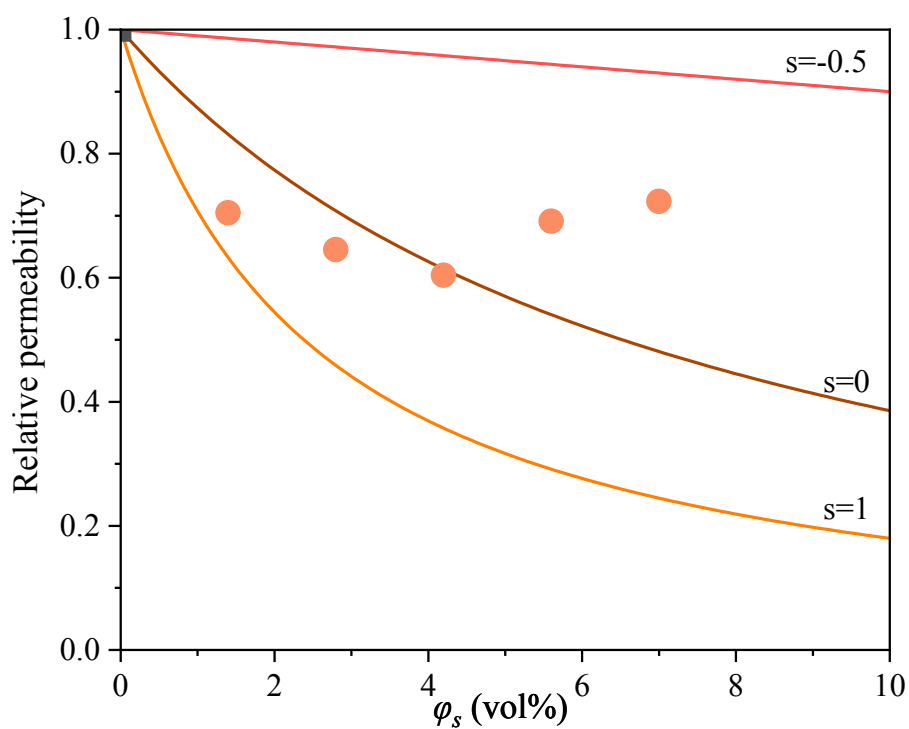

**Figure S2** Comparison between the experimental data obtained with respect to  $P_{O_2}$  and the Bharadwaj model for the relative permeability in terms of the OMMT loadings for  $L/W = 80$ .

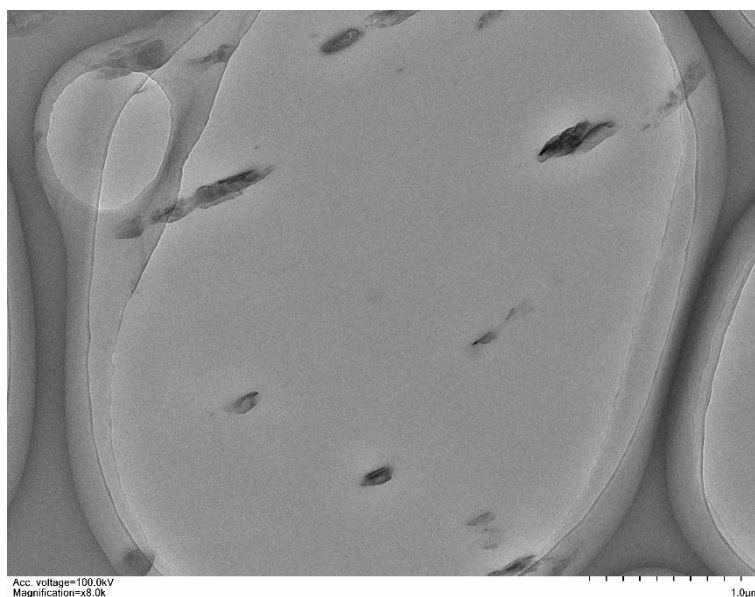

**Figure S3** TEM images of PLA/OMMT-6

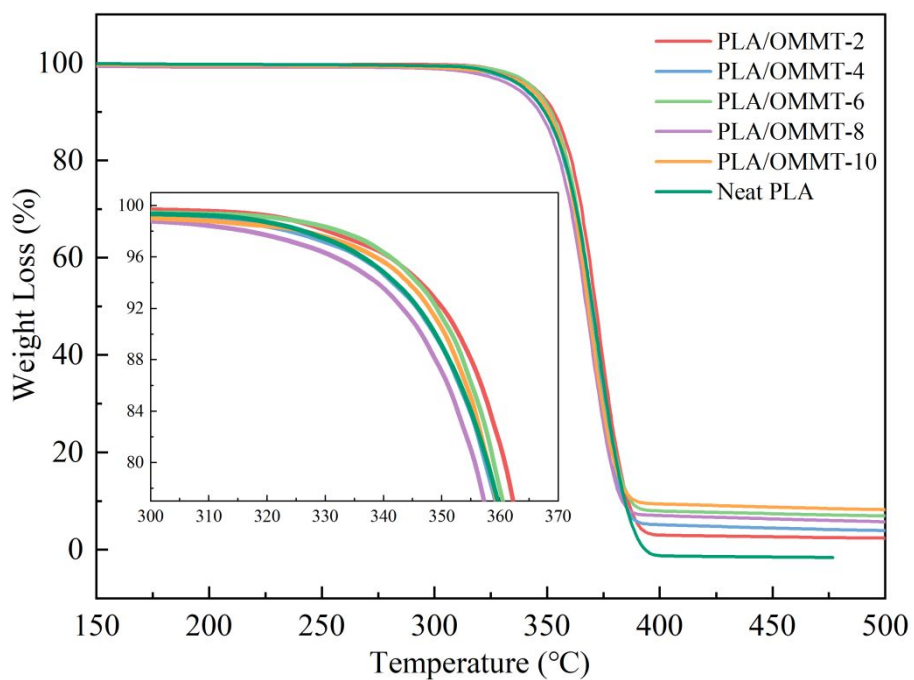

**Figure S4** Thermal gravimetric curves of the PLA and PLA/OMMT nanocomposites with different amounts of OMMT (10 °C/min at N<sub>2</sub>).
